# Supplementary material for: Targeting the MET Receptor Tyrosine Kinase as a Strategy for Radiosensitization in Locoregionally Advanced Head and Neck Squamous Cell Carcinoma
Source: Oxford University Press journal article supplement (doi:10.1158/1535-7163.mct-18-1274), 2019-11-19
Supplement: 15357163mct181274-sup-212043_3_supp_5875082_q0d54t.docx [file 15357163mct181274-sup-212043_3_supp_5875082_q0d54t.docx]

**Suppl. Table 2. Odds ratio per protein.**

| **UM-SCC-10B** | |  |  |
| --- | --- | --- | --- |
| **Protein** | **OR mean** | **OR low** | **OR high** |
| EPHA2 | -0.053 | -0.054 | -0.052 |
| pS6 | -0.029 | -0.030 | -0.028 |
| Ki67 | 0.018 | 0.017 | 0.019 |
| pp53 | 0.015 | 0.014 | 0.016 |
| EGFR | 0.009 | 0.008 | 0.010 |
| pAKT | -0.006 | -0.007 | -0.005 |
| Vimentin | 0.006 | 0.005 | 0.007 |
| YAP1 | 0.005 | 0.004 | 0.006 |
| TIMP3 | -0.005 | -0.006 | -0.005 |
| pEGFR | -0.005 | -0.005 | -0.004 |
| HER2 | -0.004 | -0.005 | -0.003 |
| HES1 | 0.003 | 0.002 | 0.004 |
| PARP | -0.003 | -0.004 | -0.002 |
| MDR1 | 0.003 | 0.002 | 0.004 |
| pERK | -0.002 | -0.003 | -0.001 |
| DDR2 | -0.001 | -0.002 | -0.001 |
| TRAF3 | 0.001 | 0.000 | 0.002 |
| MMP9 | -0.001 | -0.001 | 0.000 |
| ALDH1A1 | 0.000 | -0.001 | 0.001 |
|  |  |  |  |
| **HN5** | | | |
| **Protein** | **OR mean** | **OR low** | **OR high** |
| EPHA2 | 0.000 | 0.000 | 0.000 |
| pS6 | 0.000 | 0.000 | 0.000 |
| Ki67 | 0.000 | 0.000 | 0.000 |
| pp53 | 0.000 | 0.000 | 0.000 |
| EGFR | 0.000 | 0.000 | 0.000 |
| pAKT | 0.000 | 0.000 | 0.000 |
| Vimentin | 0.000 | 0.000 | 0.000 |
| YAP1 | 0.000 | 0.000 | 0.000 |
| TIMP3 | -0.016 | -0.019 | -0.013 |
| pEGFR | 0.000 | 0.000 | 0.000 |
| HER2 | 0.000 | 0.000 | 0.000 |
| HES1 | 0.000 | 0.000 | 0.000 |
| PARP | 0.000 | 0.000 | 0.000 |
| MDR1 | 0.000 | 0.000 | 0.000 |
| pERK | 0.000 | 0.000 | 0.000 |
| DDR2 | 0.000 | 0.000 | 0.000 |
| TRAF3 | 0.000 | 0.000 | 0.000 |
| MMP9 | -0.002 | -0.005 | 0.000 |
| ALDH1A1 | 0.000 | 0.000 | 0.000 |
